# Supplementary material for: Shotgun Metagenomic Sequencing Revealed the Prebiotic Potential of a Fruit Juice Drink With Fermentable Fibers in Healthy Humans
Source: Preprints.org preprint supplement (doi:10.20944/preprints202305.0098.v1), 2023-05-03
Supplement: Supplementary file 2 [file Supplemental raw data selection.xlsx]

## Sheet: Metagenome
		Prebiotic			Placebo
Module	Name	Uncorrected	Corrected	Effect	Effect	Uncorrected	Corrected
M00620	Incomplete reductive citrate cycle, acetyl-CoA => oxoglutarate	0.0236731	0.437731	-0.503638	-0.108711	0.115622	0.666548
M00845	Arginine biosynthesis, glutamate => acetylcitrulline => arginine	0.0343902	0.451754	0.392644	-0.0179178	0.792564	0.942034
M00844	Arginine biosynthesis, ornithine => arginine	0.0377803	0.457119	0.459553	0.144208	0.551915	0.879055
M0029	Urea cycle	0.0362542	0.451285	0.49521	0.151323	0.552921	0.880477
M00878	Phenylacetate degradation, phenylaxetate => acetyl-CoA/succinyl-CoA	0.0366261	0.45288	0.297287	-0.0559601	0.467755	0.85743
M00060	KDO2-lipid A biosynthesis, Raetz pathway, LpxL-LpxM type	0.0437815	0.46572	-0.361924	-0.27799	0.43218	0.845381
M00866	KDO2-lipid A biosynthesis, Raetz pathway, non-LpxL-LpxM type	0.0443711	0.467456	-0.397423	-0.200609	0.305583	0.809819
M00159	V/A-type ATPase, prokaryotes	0.0445547	0.46545	-0.521166	0.326066	0.268535	0.797946
M00149	Succinate dehydrogenase, prokaryotes	0.693694	0.898111	-0.10655	-0.285292	0.0267639	0.474795
M00144	NADH:quinone oxidoreductase, prokaryotes	0.455678	0.808305	-0.290942	-0.201479	0.028224	0.517157
M00308	Semi-phosphorylative Entner-Doudoroff pathway, gluconate => glycerate-3P	0.420906	0.796167	0.15335	-0.180348	0.0293798	0.493016
M00173	Reductive citrate cycle (Arnon-Buchanan cycle)	0.114396	0.568508	-0.314469	-0.25314	0.0326195	0.510444
M00009	Citrate cycle (TCA cycle, Krebs cycle)	0.0513704	0.475569	-0.392367	-0.254447	0.0484505	0.556945
		Prebiotic			Placebo
Pathway	Name	Uncorrected	Corrected	Effect	Effect	Uncorrected	Corrected
M00020	Citrate cycle (TCA cycle)	0.0297639	0.953434	-0.365039	-0.232677	0.0323753	0.767007
M00750	Vitamin B6 metabolism	0.0466502	0.904798	-0.434647	-0.0268496	0.809196	0.985505
M05206	MicroRNAs in cancer	0.650745	0.98724	-0.0385596	-0.413889	0.0151997	0.726789
M00270	Cysteine and methionine metabolism	0.319742	0.984043	-0.0320439	-0.107487	0.0466003	0.809139

## Sheet: Alpha diversity p-values 
Alpha diversity p-values between treatments at each timepoint (Paired)
Alpha diversity metric	Baseline	Post-treatment
Chao1	0.1099	0.7354
Shannon	0.004639	0.4143
Simpson	0.0105	0.4143
Alpha diversity p-values between timepoints during each treament (Paired)
Alpha diversity metric	Placebo	Prebiotic
Chao1	0.2734	0.1726
Shannon	0.09424	0.008545
Simpson	0.1099	0.01343
Alpha diversity difference p-values between treaments
Type	Treatment
Chao1	0.943
Shannon	0.002747
Simpson	0.005596

## Sheet: Beta diversity significance 
Beta diversity significance of grouping
Dimension	Timepoint	Treatment	Group	Timepoint * Treatment	Timepoint * Group	Treatment * Group	Group * Treatment * Timepoint
PC1	0.605	0.453	0.001	0.526	0.775	0.164	0.805
PC2	0.841	0.793	0.63	0.94	0.94	0.621	0.829
PC3	0.846	0.701	0.523	0.801	0.814	0.999	0.93
Beta diversity significance of dispersion
Dimensions	Group	Treatment	Timepoint
PC1	0.0368	0.3477	0.8124
PC2	0.0416	0.5861	0.7862
PC3	0.0624	0.7267	0.7622
PC1 & PC2	0.0059	0.5056	0.9159
PC1 & PC3	0.0032	0.3453	0.9008
PC2 & PC3	0.1197	0.816	0.699
PC1 - PC3	0.0073	0.4914	0.7785

## Sheet: Placebo
RSV	Phylum	Class	Order	Family	Genus	Species	Uncorrected p-value	Corrected p-value	Effect
21240	Firmicutes_A	Clostridia	Oscillospirales	Oscillospiraceae	CAG-83	sp000431575	0.0368199	0.96697	0.377325
24793	Firmicutes_A	Clostridia	Oscillospirales	Oscillospiraceae	ER4	sp900317525	0.0465136	0.895407	0.081572
23310	Firmicutes_A	Clostridia	Lachnospirales	Lachnospiraceae	Coprococcus_A	catus	0.0467882	0.97161	-0.252995
24560	Firmicutes_A	Clostridia	Lachnospirales	Lachnospiraceae	Dorea	longicatena_B	0.0656514	0.971509	-0.474239
24557	Firmicutes_A	Clostridia	Lachnospirales	Lachnospiraceae	Dorea	formicigenerans	0.0710773	0.970675	-0.235672
52251	Firmicutes_A	Clostridia	Oscillospirales	Butyricicoccaceae	UMGS1384	sp900551265	0.0710959	0.921858	0.345921
24559	Firmicutes_A	Clostridia	Lachnospirales	Lachnospiraceae	Dorea	longicatena	0.0832191	0.968828	-0.145947
21254	Firmicutes_A	Clostridia	Oscillospirales	Oscillospiraceae	CAG-83	sp900545585	0.0945339	0.966829	0.0897862

## Sheet: Prebiotic
20809	Firmicutes_A	Clostridia	Oscillospirales	Oscillospiraceae	CAG-110	sp000434635	0.0116563	0.414347	-0.172666
21232	Firmicutes_A	Clostridia	Lachnospirales	Lachnospiraceae	CAG-81	sp900066785	0.012753	0.508293	0.3005
43246	Firmicutes_A	Clostridia	Oscillospirales	Ruminococcaceae	Ruthenibacterium	lactatiformans	0.0174785	0.516846	-0.355854
20807	Firmicutes_A	Clostridia	Oscillospirales	Oscillospiraceae	CAG-103	sp900543625	0.0307355	0.51588	-0.266754
43402	Firmicutes_A	Clostridia_A	Christensenellales	CAG-138	SFEL01	sp004557245	0.0373762	0.542682	-0.198596
19621	Actinobacteriota	Actinomycetia	Actinomycetales	Bifidobacteriaceae	Bifidobacterium	adolescentis	0.0395598	0.50809	0.308797
50942	Firmicutes_A	Clostridia	Oscillospirales	Oscillospiraceae	UBA5446	sp900544295	0.0418837	0.480281	-0.272028
25095	Firmicutes_A	Clostridia	Lachnospirales	Lachnospiraceae	Enterocloster	bolteae	0.0428336	0.552637	-0.165846
20898	Firmicutes_A	Clostridia	Oscillospirales	Oscillospiraceae	CAG-170	sp000436735	0.0471706	0.555685	-0.124431
26990	Firmicutes_A	Clostridia	Lachnospirales	Lachnospiraceae	Fusicatenibacter	saccharivorans	0.0536296	0.62179	0.299465
21240	Firmicutes_A	Clostridia	Oscillospirales	Oscillospiraceae	CAG-83	sp000431575	0.0576673	0.62392	-0.219998
21229	Firmicutes_A	Clostridia	Lachnospirales	Lachnospiraceae	CAG-81	sp000435795	0.0600972	0.534008	-0.213199
25101	Firmicutes_A	Clostridia	Lachnospirales	Lachnospiraceae	Enterocloster	sp000431375	0.0609326	0.626687	0.168195
20905	Firmicutes_A	Clostridia	Oscillospirales	Oscillospiraceae	CAG-170	sp900548625	0.0630476	0.58482	-0.186851
19870	Firmicutes_A	Clostridia	Lachnospirales	Lachnospiraceae	Blautia_A	sp900066335	0.063997	0.617053	0.212118
20904	Firmicutes_A	Clostridia	Oscillospirales	Oscillospiraceae	CAG-170	sp900545925	0.0643024	0.586124	-0.107691
17725	Firmicutes_A	Clostridia	Lachnospirales	Lachnospiraceae	Anaerostipes	hadrus	0.0647974	0.635763	0.12981
21261	Firmicutes_A	Clostridia	Oscillospirales	Oscillospiraceae	CAG-83	sp900551995	0.0667019	0.601271	-0.137828
26469	Firmicutes_A	Clostridia_A	Christensenellales	CAG-74	Firm-11	sp004556545	0.07528	0.618341	-0.245111
46322	Firmicutes	Bacilli	Lactobacillales	Streptococcaceae	Streptococcus	salivarius	0.0755858	0.58101	0.438289
26158	Firmicutes_A	Clostridia	Oscillospirales	Ruminococcaceae	Faecalibacterium	prausnitzii	0.0763116	0.645349	0.212683
26165	Firmicutes_A	Clostridia	Oscillospirales	Ruminococcaceae	Faecalibacterium	prausnitzii_H	0.0797381	0.647016	0.154594
38040	Proteobacteria	Gammaproteobacteria	Burkholderiales	Burkholderiaceae	Parasutterella	excrementihominis	0.0807774	0.57041	0.127634
29824	Firmicutes_A	Clostridia	Oscillospirales	Oscillospiraceae	Intestinimonas	massiliensis	0.0834289	0.617412	-0.163608
36546	Bacteroidota	Bacteroidia	Bacteroidales	Marinifilaceae	Odoribacter	splanchnicus	0.0844383	0.646065	-0.217839
17740	Firmicutes_A	Clostridia	Oscillospirales	Ruminococcaceae	Anaerotruncus	colihominis	0.0854518	0.648377	-0.182531
21248	Firmicutes_A	Clostridia	Oscillospirales	Oscillospiraceae	CAG-83	sp003539495	0.0868349	0.62207	-0.152997
26799	Firmicutes_A	Clostridia	Oscillospirales	Oscillospiraceae	Flavonifractor	sp900549795	0.0960331	0.639232	-0.237666
20802	Firmicutes_A	Clostridia	Oscillospirales	Oscillospiraceae	CAG-103	sp000432375	0.0982149	0.616031	-0.132201
20826	Firmicutes_A	Clostridia	Oscillospirales	Oscillospiraceae	CAG-110	sp900544945	0.0994465	0.626405	-0.113744
